# Supplementary material for: GLT: Grouping Based Location Tracking for Object Tracking Sensor Networks
Source: Hindawi journal article supplement (doi:10.1155/2017/4509697), 2017-01-01
Supplement: f1 [file 4509697.f1.docx]

Toolkit: Two Tiers Data Aggregation and Reporting Algorithm for Object Tracking Sensor Networks

# Contents

[Contents 1](#_Toc457331200)

[Introduction 1](#_Toc457331201)

[Downloads 1](#_Toc457331202)

[How to use the Demo toolkit 1](#_Toc457331203)

[Basic functions 2](#_Toc457331204)

[Source code 2](#_Toc457331205)

[Bugs 2](#_Toc457331206)

[Installation Problems 2](#_Toc457331207)

[Figures 3](#_Toc457331208)

# Introduction

This toolkit is designed to simulate the GLT protocol. The toolkit is developed using C# and WPF in .NET 4.5. See the requirements in Table 1. You can watch the simulation tool kit and how it works in the link: <https://www.youtube.com/watch?v=Ss9io7Jf-XI>

Table 1: requirements

| Item | Features |
| --- | --- |
| Operating system | Windows 7 or above |
| Platform | .NET 4.5 or above |
| Programing Language | C# |
| User Interface | WPF |
| Developing Tool | Visual studio 2012 |

# Downloads

1. Download the demo toolkit: <http://staff.ustc.edu.cn/~anmande/GLT/Toolkit.rar>
2. Download the source code: <http://staff.ustc.edu.cn/~anmande/GLT/Sourcecode.rar>
3. Download this guide as PDF: <http://staff.ustc.edu.cn/~anmande/GLT/Simulator.pdf>

# How to use the Demo toolkit

1. [Download](http://staff.ustc.edu.cn/~anmande/GLT/Toolkit.rar) the demo first.
2. Click on the icon
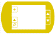
 in the folder "**Toolkit**"; you will see the main window as shown in **Figure 1**. If you can't run the toolkit please see the "**Installation Problems ‎1-"**
3. Import the network topology: **File-> Import Topology**; you will see samples of topologies as shown in **Figure 2**. Select "**import**". For example, if you selected the " **418ZIG_15M**", the network will be shown in **Figure 3.** If you can't see the topologies please check the "**Installation Problems ‎2-**".
4. Select the Coverage Protocol: from the "**Coverage**" menu select: **Coverage->Random**;
5. Add the mobile objects: From **File->Add Mobile Objects.** You will see a window as shown in **Figure 4**. The location of the sink is located in NODE ID 0. To display the nodes IDs: **Display->show ID.** You can also move the objects by pressing down on the object and drag it to the location you want.
6. Simulation time setup: **File-> simulation time**.
7. Start the simulation: **File-> Start Simulation.** You will see three node colors when the objects are moving representing the state of the nodes i.e., idle, active or sleep (see **Figure 5**).

# Basic functions

1. Show the simulation report: **others->show total Report** (see **Figure 6**).
2. Routing Log: **others->Print HST Routing Log** (see **Figure 7**).
3. Show the packets: **others->show packets** (see **Figure 8**).
4. Show the situations of all nodes**: others->Print the summary of sensors** (see **Figure 9**).
5. Show the NT tree for each node: **others->Print NT** (see **Figure 10**).
6. Show the notifications (insert/delete): **others-> Print Notifications** (see **Figure 11**).
7. Show the objects trajectory: **others->Print Trajectory for each object** (you will see a window as shown in **Figure 12**). You can press on the button "
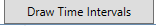
" to see the time intervals and nodes locations as shown in **Figure 13**.
8. Show the mobility pattern of the objects: **others->Draw Trajectory for object** (see **Figure 14**).

# Source code

The [**Source code**](http://staff.ustc.edu.cn/~anmande/GLT/Sourcecode.rar) is developed by C#, WPF, .NET 4.5 VS 2012. Please make sure that your computer meets the minimum requirements in **Table 1**.

# Bugs

This tool kit is under development and will be updated from time to time. If there is any bug, please download the newest version. If you encounter any bug, please restart the toolkit.

# Installation Problems

1. **I can't run the Tool kit:**

- Please install the **DOT NET 4.5**: Click [here](https://www.microsoft.com/en-us/download/details.aspx?id=42642) to download.

1. **I can't see the topologies:**

- Tool kit can't read the topology, please install the **OLEDB engine**. Click [here](https://www.microsoft.com/en-in/download/details.aspx?id=13255) to download.

1. If you encounter other problems, please check your operating system. This tool kit is tested on windows 7 platform.

# Figures


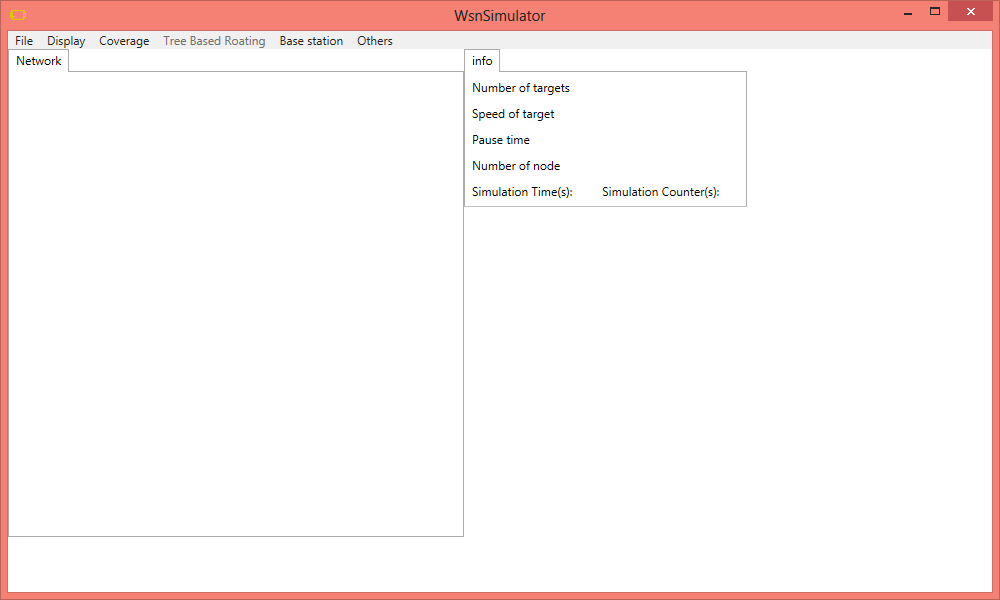


Figure 1: Main screen


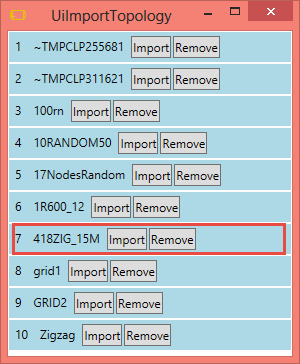


Figure 2: Topologies


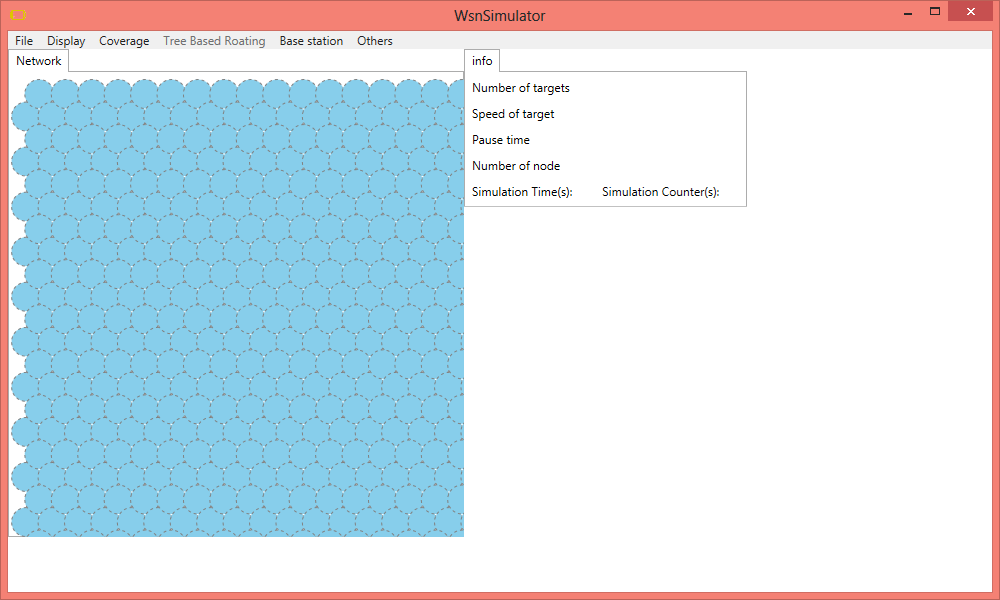


Figure 3: Deployed nodes


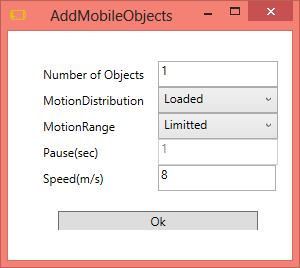


Figure 4: Add Mobile objects.


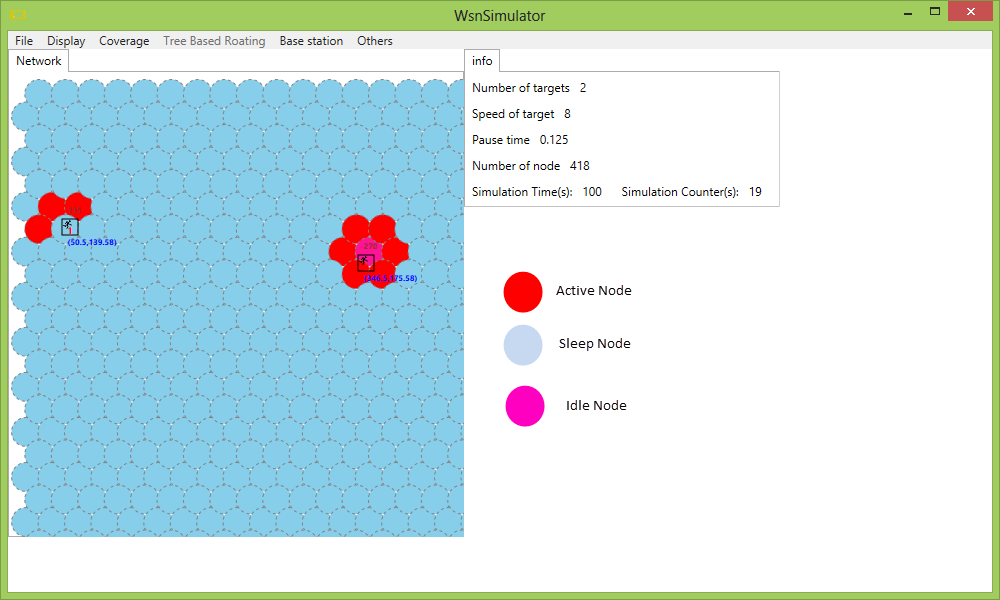


Figure 5: Two objects are moving randomly in the field


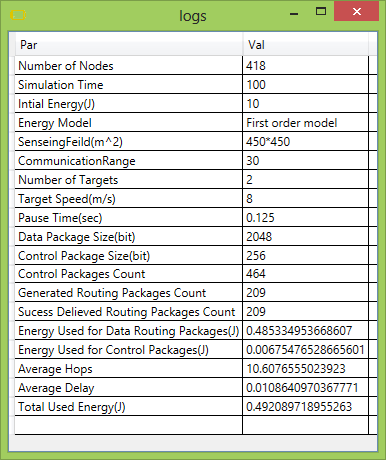


Figure 6: Show The Total Report.


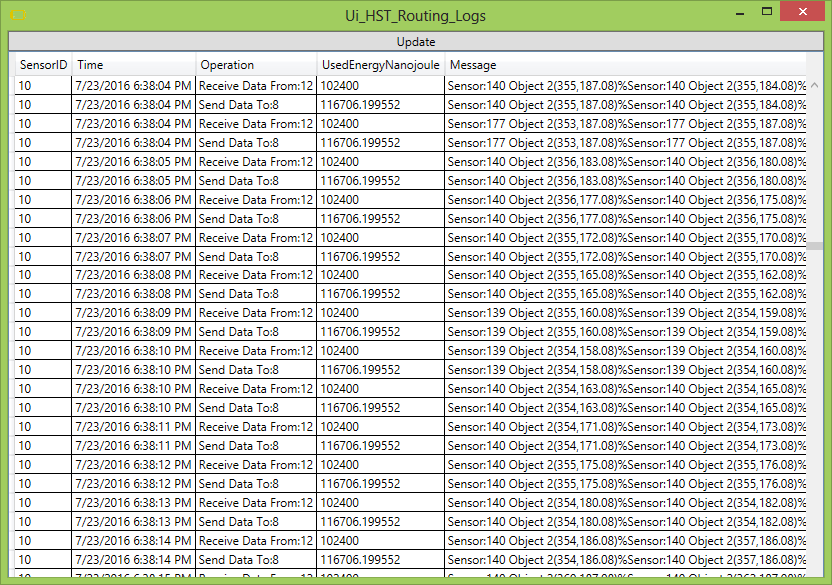


Figure 7: Routing Log


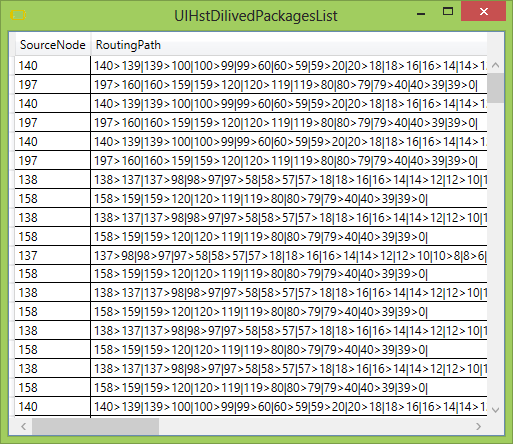


Figure 8: packets paths


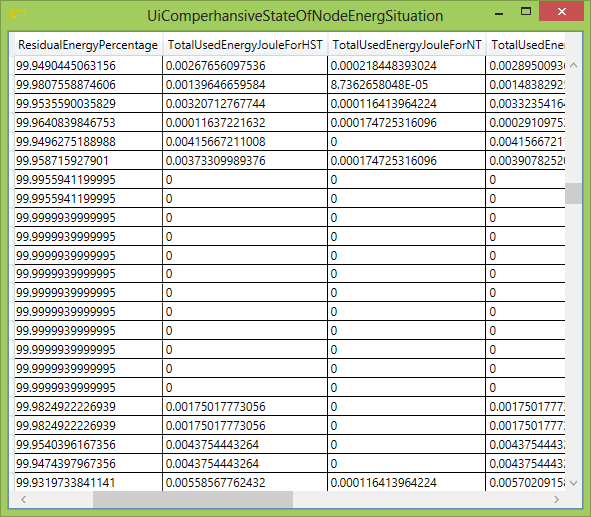


Figure 9: Nodes Situations


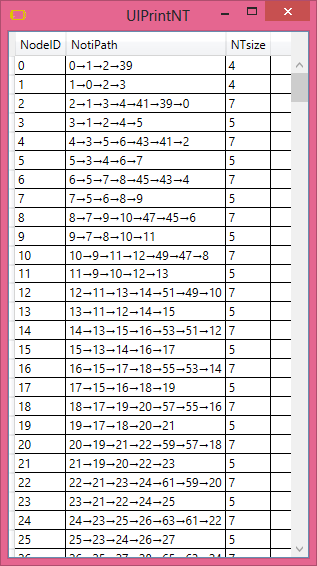


Figure 10: Notifications Trees


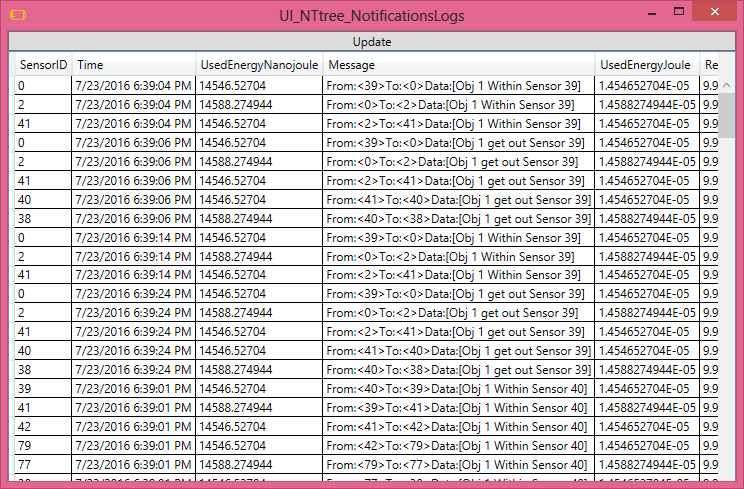


Figure 11: Notifications Log


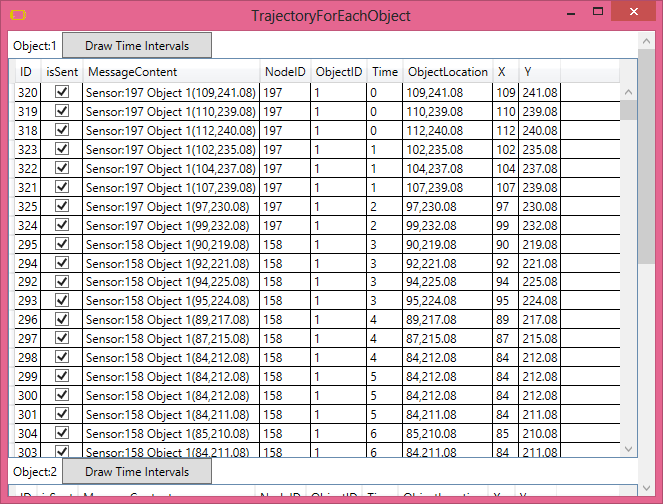


Figure 12: Time intervals and objects location (See **Figure 13**)


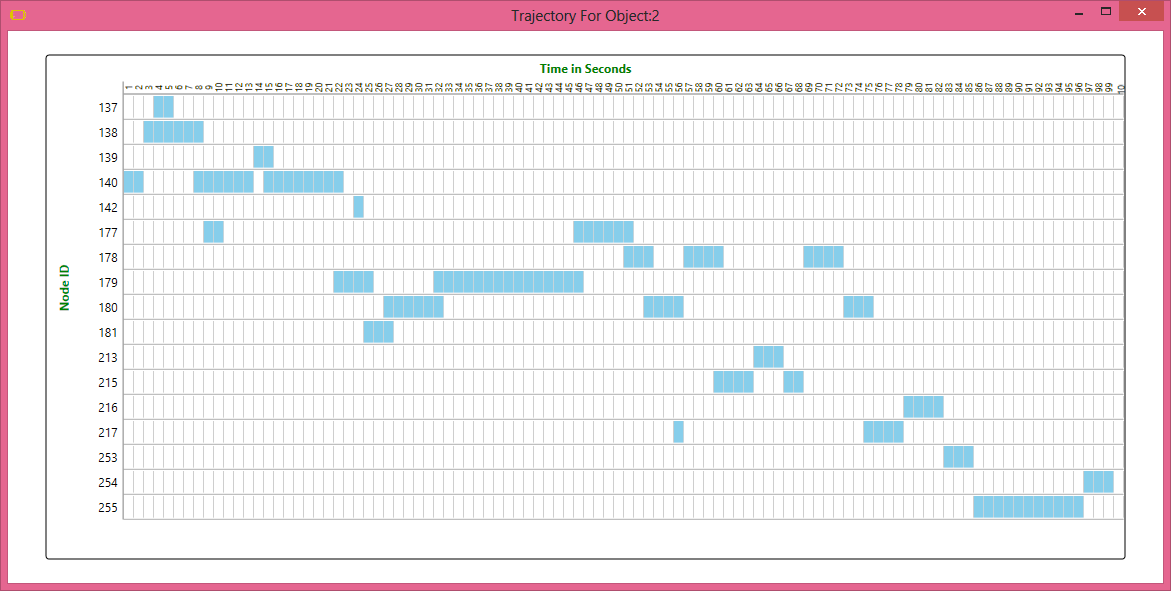


Figure 13: Time intervals and proxy nodes


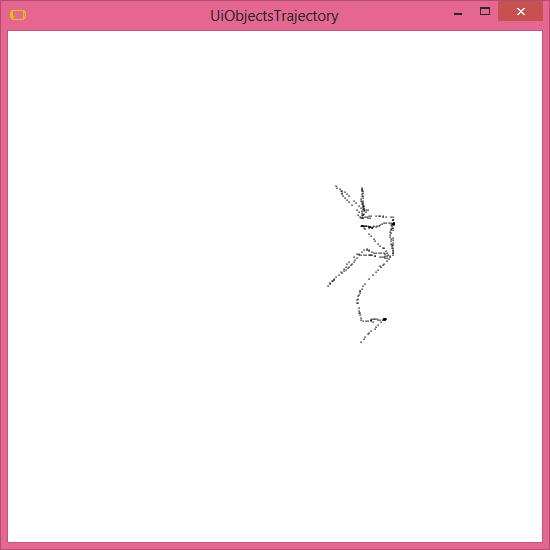


Figure 14: Object mobility pattern
